# Supplementary material for: Adherence and persistence to pharmacotherapy in patients with heart failure: a nationwide cohort study, 2014–2020
Source: PubMed Central journal article supplement — ESC Heart Fail. 2022 Oct 20;10(1):405–15. doi: 10.1002/ehf2.14206 (PMC9871690; doi:10.1002/ehf2.14206), 2022-10-20
Supplement: EHF2-10-405-s001.pdf [file EHF2-10-405-s001.pdf]

## Electronic supplementary material

# Adherence to guideline-directed medical therapy in patients with heart failure: a nationwide cohort study, 2014-2020.

Kristina Malene Ødegaard\*<sup>1,2</sup>, Sandre Svaton Lirhus<sup>3</sup>, Hans Olav Melberg<sup>4</sup>, Jonas Hallén<sup>5</sup>, and Sigrun Halvorsen<sup>1,6</sup>

<sup>1</sup> Institute of Clinical Medicine, University of Oslo, Oslo, Norway;

<sup>2</sup> Novartis Norway AS, Oslo, Norway;

<sup>3</sup> Institute of Health and Society, University of Oslo, Oslo, Norway;

<sup>4</sup> Department of Community Medicine, UiT - The Arctic University of Norway; Tromsø, Norway;

<sup>5</sup> Arxx Therapeutics, Oslo, Norway;

<sup>6</sup> Department of Cardiology, Oslo University Hospital Ullevål, Oslo, Norway

### Abbreviations

|                    |                                           |
|--------------------|-------------------------------------------|
| HF:                | heart failure                             |
| RASI:              | renin-angiotensin system inhibitor        |
| BB:                | beta-blocker                              |
| MRA:               | mineralocorticoid receptor antagonist     |
| ACEI:              | angiotensin-converting enzyme inhibitor   |
| ARB:               | angiotensin II receptor blocker           |
| ARNI:              | angiotensin receptor-neprilysin inhibitor |
| SGLT2:             | sodium-glucose co-transporter 2           |
| Dual HF therapy:   | RASI + BB, RASI + MRA, or BB + MRA        |
| Triple HF therapy: | RASI + BB + MRA                           |
| DDD:               | defined daily dose                        |
| PDC:               | proportion of days covered                |

**ESM Table 1. Definitions**

| <b>Condition</b>                                   | <b>NPR: ICD-10 code</b>                                              | <b>NorPD: ATC code or reimbursement code (ICD-10 or ICPC-2)</b>                                                                                                                                                                                                                              |
|----------------------------------------------------|----------------------------------------------------------------------|----------------------------------------------------------------------------------------------------------------------------------------------------------------------------------------------------------------------------------------------------------------------------------------------|
| Heart Failure                                      | I11.0, I13.0, I13.2, I42.x and I50.x                                 |                                                                                                                                                                                                                                                                                              |
| Atrial fibrillation                                | I48                                                                  | Reimbursement codes: I48, K78 (ICPC)                                                                                                                                                                                                                                                         |
| Cerebrovascular disease (including stroke and TIA) | G45, G46, H34.0, I60-I69                                             |                                                                                                                                                                                                                                                                                              |
| Hypertension                                       | I10, I11, I12, I13, I15                                              | Reimbursement codes: I10-I13, I15 (ICD10) or K86, K87 (ICPC)                                                                                                                                                                                                                                 |
| Ischemic heart disease                             | I20, I21, I22, I23, I24, I25                                         | Reimbursement codes I20-I25 (ICD-10)                                                                                                                                                                                                                                                         |
| Myocardial infarction                              | I21, I22                                                             |                                                                                                                                                                                                                                                                                              |
| Peripheral artery disease                          | I70, I71, I72, I73, I74, I77, I78, I79, R02                          |                                                                                                                                                                                                                                                                                              |
| COPD                                               | J40-J44                                                              | Reimbursement codes J40-J44 (ICD-10) or R95 (ICPC-2)                                                                                                                                                                                                                                         |
| Anemia                                             | D50, D51, D52, D53, D55, D56, D57, D58, D59, D60, D61, D62, D63, D64 | ICPC: Reimbursement codes B80, B81, B82 or ICD10: D50, D51, D52, D53, D55, D56, D57, D58, D59, D60, D61, D62, D63, D64                                                                                                                                                                       |
| Cancer                                             | C00-C97                                                              |                                                                                                                                                                                                                                                                                              |
| Chronic kidney disease                             | N17-N19                                                              |                                                                                                                                                                                                                                                                                              |
| Dementia                                           | F00, F01, F02, F03, G30, G31.8                                       | Reimbursement code P70 (ICPC)                                                                                                                                                                                                                                                                |
| Depression                                         | F32, F33                                                             | Reimbursement codes P03 (ICPC), P76 (ICPC)<br>Or ATC-code N06A                                                                                                                                                                                                                               |
| Diabetes Mellitus                                  | E10-E14                                                              | ATC codes: A10A or A10B<br>or reimbursement codes: E10, E11, E13, E14 (ICD-10)<br>or T89, T90 (ICPC-2)                                                                                                                                                                                       |
| Dyslipidemia                                       | E78                                                                  | Reimbursement codes: E78 (ICD-10) or T93 (ICPC)<br>ATC-codes: C10A or C10B                                                                                                                                                                                                                   |
| Thyroid disease                                    |                                                                      | ATC-codes: H03, H01AB or Reimbursement codes T85 (ICPC), T86 (ICPC)                                                                                                                                                                                                                          |
| <b>Medication</b>                                  |                                                                      | <b>ATC-codes</b>                                                                                                                                                                                                                                                                             |
| ACEI                                               |                                                                      | C09AA01 captopril<br>C09AA02 enalapril<br>C09AA03 lisinopril<br>C09AA04 perindopril<br>C09AA05 ramipril<br><br>C09BA01 captopril and diuretics<br>C09BA02 enalapril and diuretics<br>C09BA03 lisinopril and diuretics<br>C09BA04 perindopril and diuretics<br>C09BA05 ramipril and diuretics |
| ARB                                                |                                                                      | C09CA01 losartan<br>C09CA03 valsartan                                                                                                                                                                                                                                                        |

|                                 |  |                                                                                                                                            |
|---------------------------------|--|--------------------------------------------------------------------------------------------------------------------------------------------|
|                                 |  | C09CA06 candesartan<br>C09DA01 losartan and diuretics<br>C09DA03 valsartan and diuretics<br>C09DA06 candesartan and diuretics              |
| ARNI                            |  | C09DX04 valsartan and sacubitril                                                                                                           |
| BB                              |  | C07AB02 metoprolol<br>C07AB07 bisoprolol<br>C07AG02 carvedilol<br><br>C07BB02 metoprolol and thiazides<br>C07BB07 bisoprolol and thiazides |
| MRA                             |  | C03DA01 spironolactone<br>C03DA04 eplerenone                                                                                               |
| Loop-diuretics                  |  | C03CA01 furosemide<br>C03CA02 bumetanide                                                                                                   |
| <b>Co-medication</b>            |  |                                                                                                                                            |
| High-ceiling diuretics          |  | C03C                                                                                                                                       |
| Antithrombotic agents           |  | B01A, excluding B01AC                                                                                                                      |
| Calcium channel blockers        |  | C08                                                                                                                                        |
| Platelet aggregation inhibitors |  | B01AC                                                                                                                                      |
| SGLT2 inhibitors                |  | A10BK                                                                                                                                      |
| Lipid-lowering therapy          |  | C10A<br>C10B                                                                                                                               |

Comorbidities at baseline were based on registrations during the lookback period.  
Medication at baselined were registered from -180 days to -1 days before index.

**ESM Figure 1. Proportion of days covered**

Schematic example of adherence to a single medication starting at the first prescription fill and with one year of follow-up. In this hypothetical example, the first fill lasts for 70 days, leaving a gap of 20 days until 2<sup>nd</sup> fill. As 3<sup>rd</sup> fill is overlapping with 30 days, the prescription is shifting (=stockpiling) by 30 days. The 4<sup>th</sup> fill is also overlapping with 15 days, leaving a gap of 15 days until the 5<sup>th</sup> fill. In this example, PDC equals the number of days covered (blue boxes) divided by days of observations =  $330/365 = 0.9$ . PDC; proportion of days covered, Rx; prescription.

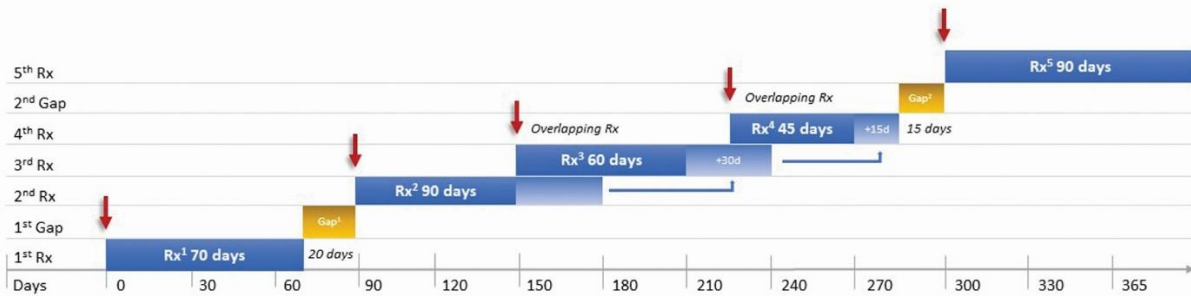

**ESM Table 2.** Guideline recommended treatment for heart failure and rationale for method

As for most claims databases worldwide, the NorPD does not contain information on the prescribed daily dose (PDD) by the treating physician. Some pharmacoepidemiologic studies use the ‘defined daily dose’ (DDD), defined by the World Health Organization (WHO) as the assumed average daily maintenance dose for a drug used for its main indication in adults. However, the DDD does not necessarily reflect the recommended or prescribed daily dose, and this is particularly evident for HF drugs as the main indication for most of these drugs are not HF but mild to moderate hypertension. This makes DDD a questionable surrogate for PDD. ESM Table 2 shows the uneven distribution of DDDs, both between and within drug groups, when DDD was calculated as a percentage of the target dose. Instead of using DDDs, we divided the dispensed quantity (number of pills) on the expected number of doses per day for each drug (the recommended daily regimen from the agent’ product monograph or from clinical expert opinion) to calculate the duration of each dispensed prescription. We used one tablet a day for all drugs, except for Captopril, Carvedilol, Valsartan and Sacubitril/Valsartan (twice daily).

| Medication           | No of tablets per day (products monograph) | Target dose/day | DDD (mg)      | DDD as % of target dose | No of tablets per day (for PDC calculations) |
|----------------------|--------------------------------------------|-----------------|---------------|-------------------------|----------------------------------------------|
| <b>ACEI</b>          |                                            |                 |               |                         |                                              |
| Captopril            | 2-3                                        | 150             | 50            | 0,33                    | 2                                            |
| Enalapril            | 2                                          | 20-40           | 10            | 0,25 - 0,5              | 1                                            |
| Lisinopril           | 1                                          | 20-30           | 10            | 0,33 - 0,5              | 1                                            |
| Ramipril             | 2                                          | 10              | 2,5           | 0,25                    | 1                                            |
| Perindopril          | 1                                          | 1,5-5           | 2,5           | 0,5 - 1,66              | 1                                            |
| <b>Beta-blocker</b>  |                                            |                 |               |                         |                                              |
| Bisoprolol           | 1                                          | 10              | 10            | 1                       | 1                                            |
| Carvedilol           | 2                                          | 320             | 37,5          | 0,12                    | 2                                            |
| Metoprolol succinate | 1                                          | 200             | 150           | 0,75                    | 1                                            |
| <b>ARB</b>           |                                            |                 |               |                         |                                              |
| Candesartan          | 1                                          | 32              | 8             | 0,25                    | 1                                            |
| Valsartan            | 2                                          | 320             | 80            | 0,25                    | 2                                            |
| Losartan             | 1                                          | 150             | 50            | 0,33                    | 1                                            |
| <b>MRA</b>           |                                            |                 |               |                         |                                              |
| Eplerenone           | 1                                          | 50              | 50            | 1                       | 1                                            |
| Spironolactone       | 1                                          | 50              | 75            | 1,5                     | 1                                            |
| <b>ARNI</b>          |                                            |                 |               |                         |                                              |
| Sacubitril/valsartan | 2                                          | 97/103 b.i.d    | 2 tbl = 1 DDD | N/A                     | 2                                            |

**ESM Table 3** Baseline characteristics of the study population from 2014-2020

|                                     | 2014       | 2015       | 2016       | 2017       | 2018       | 2019       | 2020       |
|-------------------------------------|------------|------------|------------|------------|------------|------------|------------|
| Patients (n)                        | 7299       | 7482       | 7576       | 7931       | 8138       | 8474       | 7999       |
| Age (median, IQR)                   | 69 (60-75) | 69 (60-75) | 69 (60-75) | 70 (60-75) | 70 (60-75) | 70 (60-75) | 69 (59-75) |
| Age groups (%)                      |            |            |            |            |            |            |            |
| 18-64                               | 36 %       | 36 %       | 34 %       | 34 %       | 34 %       | 35 %       | 36 %       |
| 65-80                               | 64 %       | 64 %       | 66 %       | 66 %       | 66 %       | 65 %       | 64 %       |
| Women age (median, IQR)             | 70 (62-76) | 71 (62-76) | 71 (63-76) | 71 (63-76) | 71 (63-76) | 71 (62-76) | 71 (60-76) |
| Men age (median, IQR)               | 68 (59-74) | 68 (59-74) | 68 (59-74) | 69 (59-74) | 68 (59-75) | 69 (59-75) | 69 (59-75) |
| Women, n (%)                        | 36 %       | 36 %       | 36 %       | 36 %       | 38 %       | 38 %       | 38 %       |
| ICD-codes for HF                    |            |            |            |            |            |            |            |
| I11,0                               | 3,9 %      | 3,7 %      | 4,3 %      | 3,7 %      | 3,0 %      | 2,8 %      | 3,1 %      |
| I13,0                               | 0,2 %      | 0,2 %      | 0,3 %      | 0,2 %      | 0,2 %      | 0,1 %      | 0,2 %      |
| I13,2                               | 0,1 %      | 0,1 %      | 0,2 %      | 0,1 %      | 0,1 %      | 0,1 %      | 0,1 %      |
| I42,x                               | 14,4 %     | 14,8 %     | 14,6 %     | 16,0 %     | 15,2 %     | 15,8 %     | 15,7 %     |
| I50,x                               | 84,3 %     | 84,0 %     | 84,1 %     | 83,1 %     | 84,7 %     | 84,0 %     | 83,7 %     |
| Comorbidities*                      |            |            |            |            |            |            |            |
| Atrial fibrillation                 | 39 %       | 39 %       | 40 %       | 41 %       | 41 %       | 41 %       | 40 %       |
| Cerebrovascular event               | 12 %       | 14 %       | 13 %       | 15 %       | 15 %       | 15 %       | 15 %       |
| Hypertension                        | 68 %       | 68 %       | 68 %       | 67 %       | 68 %       | 67 %       | 65 %       |
| IHD                                 | 50 %       | 48 %       | 48 %       | 47 %       | 48 %       | 48 %       | 46 %       |
| MI                                  | 26 %       | 26 %       | 26 %       | 26 %       | 26 %       | 26 %       | 25 %       |
| PAD                                 | 14 %       | 15 %       | 15 %       | 16 %       | 16 %       | 16 %       | 18 %       |
| COPD                                | 22 %       | 23 %       | 23 %       | 24 %       | 25 %       | 26 %       | 23 %       |
| Anemi                               | 15 %       | 17 %       | 18 %       | 18 %       | 19 %       | 20 %       | 20 %       |
| Cancer                              | 17 %       | 18 %       | 20 %       | 21 %       | 22 %       | 23 %       | 25 %       |
| Chronic kidney disease              | 15 %       | 15 %       | 16 %       | 16 %       | 17 %       | 17 %       | 17 %       |
| Dementia                            | 2 %        | 2 %        | 2 %        | 2 %        | 2 %        | 2 %        | 1 %        |
| Depression                          | 26 %       | 28 %       | 29 %       | 28 %       | 30 %       | 29 %       | 31 %       |
| Diabetes Mellitus                   | 22 %       | 23 %       | 22 %       | 22 %       | 23 %       | 24 %       | 23 %       |
| Dyslipidemia                        | 56 %       | 56 %       | 57 %       | 56 %       | 58 %       | 58 %       | 56 %       |
| Thyroid disease                     | 10 %       | 10 %       | 9 %        | 10 %       | 10 %       | 11 %       | 10 %       |
| Patients on HF drugs before index** |            |            |            |            |            |            |            |
| ACEI                                | 20 %       | 20 %       | 19 %       | 18 %       | 18 %       | 17 %       | 15 %       |
| ARB                                 | 20 %       | 21 %       | 21 %       | 22 %       | 23 %       | 21 %       | 22 %       |
| ARNI                                | 0 %        | 0 %        | 0 %        | 0 %        | 0 %        | 0 %        | 0 %        |
| BB                                  | 44 %       | 43 %       | 42 %       | 42 %       | 42 %       | 42 %       | 39 %       |
| MRA                                 | 3 %        | 3 %        | 3 %        | 3 %        | 3 %        | 4 %        | 3 %        |
| Loop-diuretics                      | 23 %       | 22 %       | 21 %       | 19 %       | 19 %       | 18 %       | 18 %       |
| Other medication before index       |            |            |            |            |            |            |            |
| Antithrombotic agents               | 24 %       | 25 %       | 26 %       | 28 %       | 28 %       | 27 %       | 28 %       |
| Platelet aggregation inhibitors     | 40 %       | 38 %       | 37 %       | 35 %       | 35 %       | 34 %       | 32 %       |
| Calcium channel blockers            | 22 %       | 20 %       | 21 %       | 21 %       | 20 %       | 20 %       | 20 %       |
| SGLT2                               | 0 %        | 1 %        | 1 %        | 1 %        | 2 %        | 2 %        | 2 %        |

\*Comorbidities: before index. \*\*Medications: 180 to 1 days before index.

**ESM Table 4.** Baseline characteristics of patients initiating ARNI

|                                            | <b>Total</b>       | <b>2016</b>          | <b>2017</b>          | <b>2018</b>          | <b>2019</b>          | <b>2020</b>          |
|--------------------------------------------|--------------------|----------------------|----------------------|----------------------|----------------------|----------------------|
| New patients receiving ARNI each year (n)  | 2747               | 138                  | 222                  | 429                  | 785                  | 1173                 |
| Total patients receiving ARNI per year (n) |                    | 138                  | 348                  | 735                  | 1463                 | 2512                 |
| Age (median, IQR)                          | 68<br>(58.0, 74.0) | 65.5<br>(55.0, 73.0) | 69.0<br>(59.3, 74.8) | 68.0<br>(58.0, 74.0) | 67.0<br>(57.0, 74.0) | 69.0<br>(59.0, 75.0) |
| Age groups (%)                             |                    |                      |                      |                      |                      |                      |
| 18-64 (%)                                  | 41 %               | 48 %                 | 40 %                 | 40 %                 | 43 %                 | 38 %                 |
| 65-80 (%)                                  | 59 %               | 52 %                 | 60 %                 | 60 %                 | 57 %                 | 62 %                 |
| Women, n (%)                               | 19 %               | 17 %                 | 15 %                 | 23 %                 | 17 %                 | 21 %                 |
| Comorbidities*                             |                    |                      |                      |                      |                      |                      |
| Cardiovascular                             |                    |                      |                      |                      |                      |                      |
| Atrial fibrillation                        | 53 %               | 46 %                 | 55 %                 | 54 %                 | 54 %                 | 52 %                 |
| Cerebrovascular event                      | 14 %               | 9 %                  | 16 %                 | 13 %                 | 13 %                 | 16 %                 |
| Hypertension                               | 75 %               | 77 %                 | 79 %                 | 76 %                 | 74 %                 | 75 %                 |
| Ischemic heart disease                     | 71 %               | 78 %                 | 76 %                 | 71 %                 | 69 %                 | 71 %                 |
| Myocardial infarction                      | 34 %               | 37 %                 | 31 %                 | 34 %                 | 34 %                 | 35 %                 |
| Peripheral arterial disease                | 17 %               | 14 %                 | 20 %                 | 15 %                 | 18 %                 | 17 %                 |
| Other                                      |                    |                      |                      |                      |                      |                      |
| COPD                                       | 23 %               | 18 %                 | 23 %                 | 24 %                 | 24 %                 | 23 %                 |
| Anemi                                      | 19 %               | 12 %                 | 17 %                 | 19 %                 | 19 %                 | 21 %                 |
| Cancer                                     | 18 %               | 17 %                 | 18 %                 | 17 %                 | 18 %                 | 20 %                 |
| Chronic kidney disease                     | 22 %               | 25 %                 | 22 %                 | 25 %                 | 21 %                 | 20 %                 |
| Dementia                                   | 1 %                | 1 %                  | 1 %                  | 0 %                  | 1 %                  | 0 %                  |
| Depression                                 | 26 %               | 28 %                 | 22 %                 | 26 %                 | 26 %                 | 25 %                 |
| Diabetes Mellitus                          | 29 %               | 30 %                 | 26 %                 | 33 %                 | 27 %                 | 29 %                 |
| Dyslipidemia                               | 78 %               | 80 %                 | 82 %                 | 77 %                 | 77 %                 | 78 %                 |
| Thyroid disease                            | 9 %                | 8 %                  | 7 %                  | 7 %                  | 9 %                  | 10 %                 |
| Patients on HF drugs before index**        |                    |                      |                      |                      |                      |                      |
| ACEI                                       | 60 %               | 68 %                 | 64 %                 | 68 %                 | 63 %                 | 54 %                 |
| ARB                                        | 30 %               | 26 %                 | 30 %                 | 28 %                 | 29 %                 | 32 %                 |
| BB                                         | 95 %               | 98 %                 | 97 %                 | 95 %                 | 96 %                 | 94 %                 |
| MRA                                        | 59 %               | 67 %                 | 68 %                 | 62 %                 | 63 %                 | 52 %                 |
| Loop-diuretics                             | 64 %               | 78 %                 | 69 %                 | 67 %                 | 64 %                 | 59 %                 |
| Other medication before index              |                    |                      |                      |                      |                      |                      |
| Anticoagulant agents                       | 53 %               | 49 %                 | 52 %                 | 53 %                 | 53 %                 | 54 %                 |
| Platelet aggregation inhibitors            | 56 %               | 68 %                 | 56 %                 | 58 %                 | 55 %                 | 55 %                 |
| Calcium channel blockers                   | 12 %               | 12 %                 | 13 %                 | 11 %                 | 11 %                 | 13 %                 |
| SGLT2i                                     | 8 %                | 4 %                  | 3 %                  | 4 %                  | 6 %                  | 11 %                 |

\*Comorbidities: before index. \*\*Medications: 180 to 0 days before index.

**ESM Table 5.** Drug initiation. Days from index HF to first prescription claim

|                                                | <b>RASI</b> | <b>BB</b> | <b>MRA</b> | <b>Any drug group</b> | <b>Dual HF therapy</b> | <b>Triple HF therapy</b> |
|------------------------------------------------|-------------|-----------|------------|-----------------------|------------------------|--------------------------|
| <b>Proportion of patients initiating drugs</b> |             |           |            |                       |                        |                          |
| First prescription 0-30 days (n, %)            | 45%         | 47%       | 12%        | 62%                   | 30%                    | 7%                       |
| First prescription 0-60 days (n, %)            | 55%         | 59%       | 14%        | 74%                   | 41%                    | 9%                       |
| First prescription 0-90 days (n, %)            | 61%         | 67%       | 16%        | 80%                   | 48%                    | 11%                      |
| First prescription 0-365 days (n, %)           | 69%         | 75%       | 21%        | 87%                   | 61%                    | 16%                      |



**ESM Figure 2.** Initiation per calendar year for (A) BB, (B) RASI, (C) MRA, and (D) ARNI

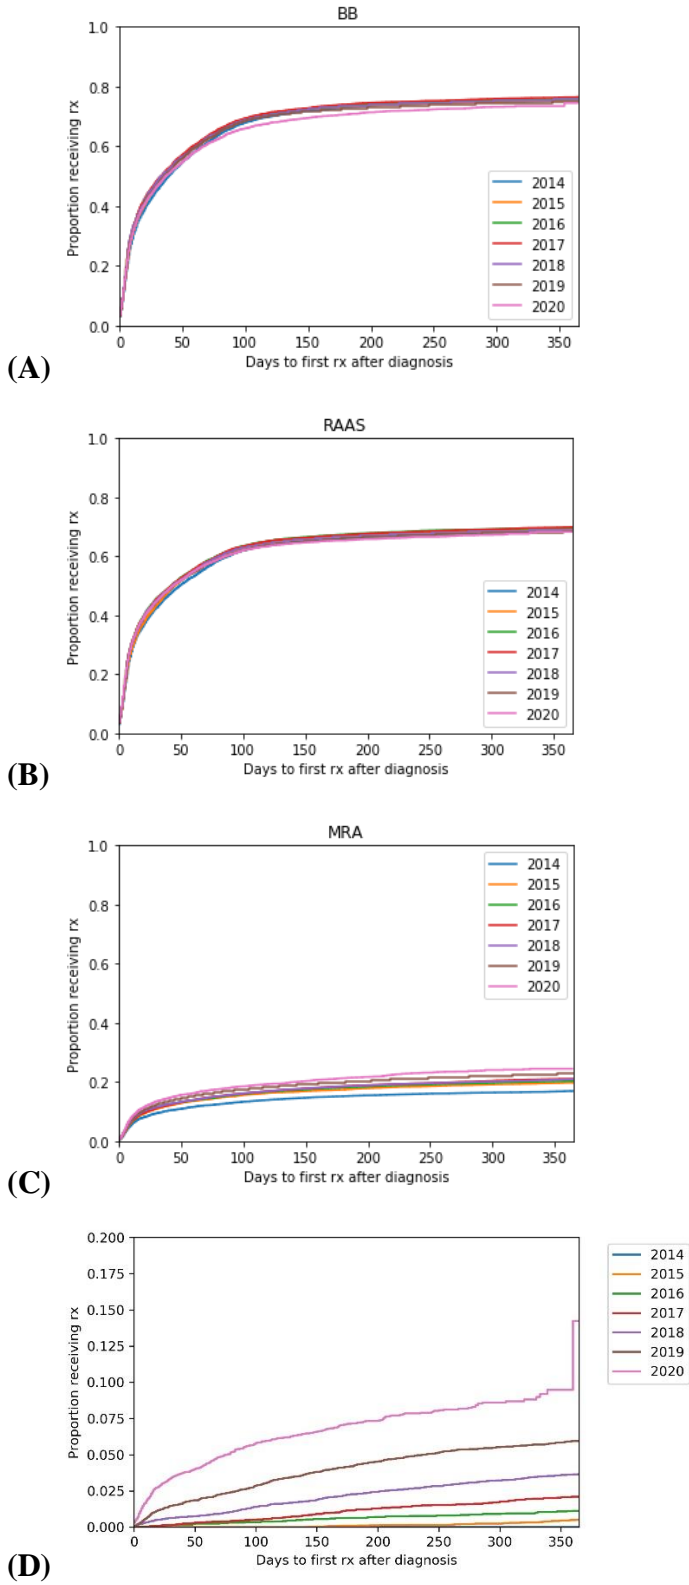

**ESM Table 6:** Adherence during the first year after initiation by 10% intervals in PDC

| PDC                                                   | RASi   |        |        |       | BB     | MRA   | At least 2 medications on the same day | Triple therapy |
|-------------------------------------------------------|--------|--------|--------|-------|--------|-------|----------------------------------------|----------------|
|                                                       |        | ARB    | ACEI   | ARNI  |        |       |                                        |                |
| n                                                     | 30,577 | 12,123 | 21,308 | 1,464 | 33,106 | 9,774 | 26,154                                 | 6,818          |
| >0%                                                   | 100 %  | 100 %  | 100 %  | 100 % | 100 %  | 100 % | 72 %                                   | 18 %           |
| ≥10%                                                  | 100 %  | 99 %   | 100 %  | 98 %  | 99 %   | 100 % | 70 %                                   | 17 %           |
| ≥20%                                                  | 99 %   | 97 %   | 99 %   | 97 %  | 99 %   | 99 %  | 69 %                                   | 16 %           |
| ≥30%                                                  | 95 %   | 90 %   | 93 %   | 95 %  | 96 %   | 87 %  | 65 %                                   | 13 %           |
| ≥40%                                                  | 94 %   | 89 %   | 92 %   | 93 %  | 95 %   | 86 %  | 62 %                                   | 12 %           |
| ≥50%                                                  | 93 %   | 86 %   | 91 %   | 92 %  | 93 %   | 84 %  | 59 %                                   | 11 %           |
| ≥60%                                                  | 87 %   | 75 %   | 85 %   | 91 %  | 89 %   | 71 %  | 54 %                                   | 8 %            |
| ≥70%                                                  | 84 %   | 71 %   | 83 %   | 88 %  | 87 %   | 67 %  | 49 %                                   | 7 %            |
| ≥80%                                                  | 81 %   | 66 %   | 80 %   | 84 %  | 83 %   | 61 %  | 42 %                                   | 5 %            |
| ≥90%                                                  | 73 %   | 57 %   | 73 %   | 76 %  | 74 %   | 49 %  | 32 %                                   | 3 %            |
| Sensitivity analysis using prescription refill method |        |        |        |       |        |       |                                        |                |
| PDC                                                   | RASi   |        |        |       | BB     | MRA   | At least 2 medications on the same day | Triple therapy |
|                                                       |        | ARB    | ACEI   | ARNI  |        |       |                                        |                |
| >0%                                                   | 100 %  | 100 %  | 100 %  | 100 % | 100 %  | 100 % | 69 %                                   | 18 %           |
| ≥10%                                                  | 100 %  | 100 %  | 100 %  | 100 % | 100 %  | 100 % | 68 %                                   | 17 %           |
| ≥20%                                                  | 100 %  | 100 %  | 100 %  | 100 % | 100 %  | 100 % | 67 %                                   | 16 %           |
| ≥30%                                                  | 96 %   | 92 %   | 92 %   | 96 %  | 96 %   | 87 %  | 63 %                                   | 13 %           |
| ≥40%                                                  | 95 %   | 92 %   | 91 %   | 96 %  | 96 %   | 87 %  | 61 %                                   | 12 %           |
| ≥50%                                                  | 91 %   | 86 %   | 86 %   | 93 %  | 92 %   | 74 %  | 58 %                                   | 11 %           |
| ≥60%                                                  | 90 %   | 84 %   | 84 %   | 92 %  | 90 %   | 71 %  | 54 %                                   | 9 %            |
| ≥70%                                                  | 87 %   | 82 %   | 81 %   | 91 %  | 88 %   | 67 %  | 49 %                                   | 7 %            |
| ≥80%                                                  | 80 %   | 73 %   | 74 %   | 88 %  | 80 %   | 55 %  | 42 %                                   | 5 %            |
| ≥90%                                                  | 69 %   | 60 %   | 64 %   | 82 %  | 68 %   | 45 %  | 32 %                                   | 3 %            |

**ESM Figure 3.** Proportion of adherent patients (PDC  $\geq 0.8$ ) from 2014 to 2019

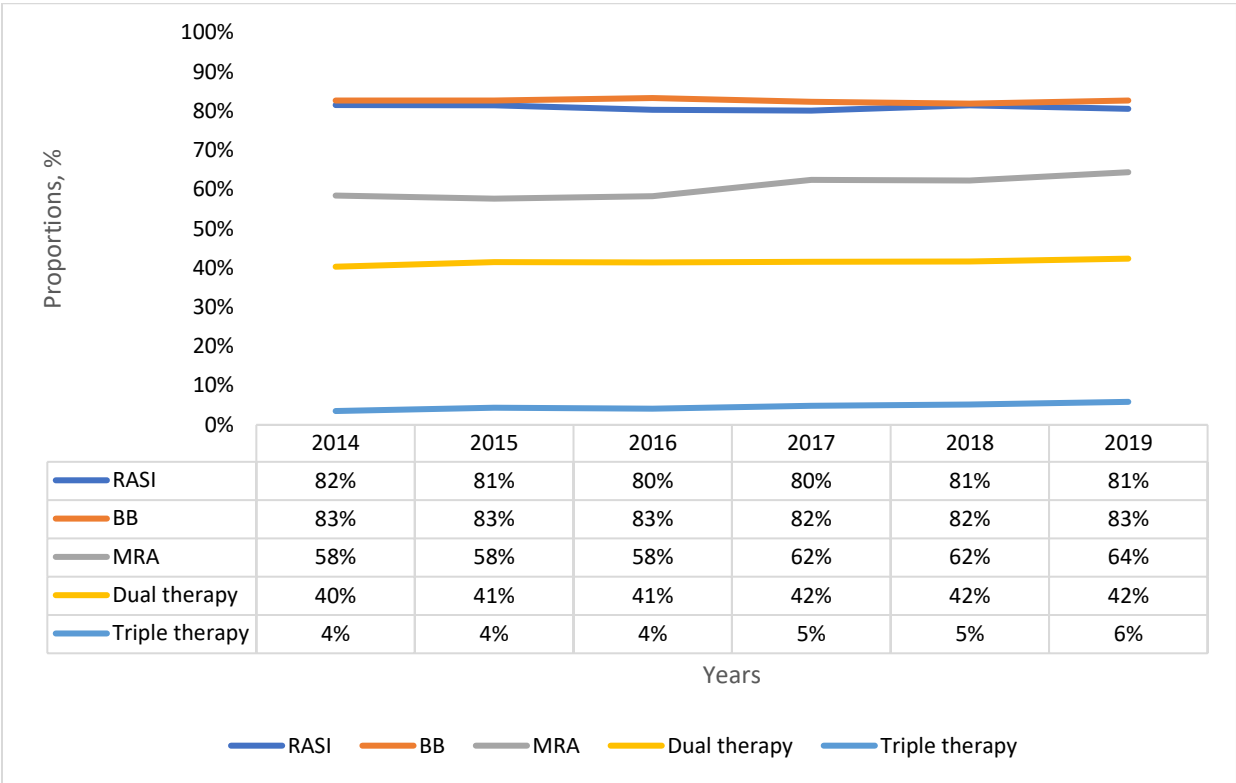

**ESM table 7:** Proportion of persistent patients with sensitivity analysis

| <b>Persistence (%)</b>                           | <b>BB</b> | <b>RASI</b> | <b>MRA</b> |
|--------------------------------------------------|-----------|-------------|------------|
| <b>After 365 days</b>                            |           |             |            |
| Tablet method, 30 days grace period              | 71.8%     | 70.7%       | 47.8%      |
| Tablet method, 90 days grace period              | 82.9%     | 81.8%       | 58.2       |
| Prescription refill method, 30 days grace period | 66.7%     | 67.3%       | 42.8%      |
| Prescription refill method, 90 days grace period | 81.7%     | 81.2%       | 55.8%      |
| <b>After 730 days</b>                            |           |             |            |
| Tablet method, 30 days grace period              | 58.3%     | 57.3%       | 31.3%      |
| Tablet method, 90days grace period               | 73.3%     | 71.2%       | 41.3%      |
| Prescription refill method, 30 days grace period | 48.0%     | 48.3%       | 24.1%      |
| Prescription refill method, 90 days grace period | 70.6%     | 69.7%       | 39.7%      |
| <b>After 1825 days</b>                           |           |             |            |
| Tablet method, 30 days grace period              | 38,2 %    | 37,4 %      | 15,4 %     |
| Tablet method, 90days grace period               | 56,8 %    | 52,7 %      | 24,0 %     |
| Prescription refill method, 30 days grace period | 24,1 %    | 22,4 %      | 9,0 %      |
| Prescription refill method, 90 days grace period | 51,1 %    | 49,1 %      | 21,9 %     |
| <b>After 2500 days</b>                           |           |             |            |
| Tablet method, 30 days grace period              | 31,0 %    | 30,5 %      | 11,4 %     |
| Tablet method, 90days grace period               | 49,2 %    | 43,1 %      | 19,1 %     |
| Prescription refill method, 30 days grace period | 16,8 %    | 14,7 %      | 6,3 %      |
| Prescription refill method, 90 days grace period | 41,1 %    | 37,4 %      | 13,8 %     |
